# Supplementary material for: Comparative genomics reveals that loss of lunatic fringe (LFNG) promotes melanoma metastasis
Source: PubMed Central journal article supplement (PMC5792739; doi:10.1002/1878-0261.12161), 2018-01-07

a)

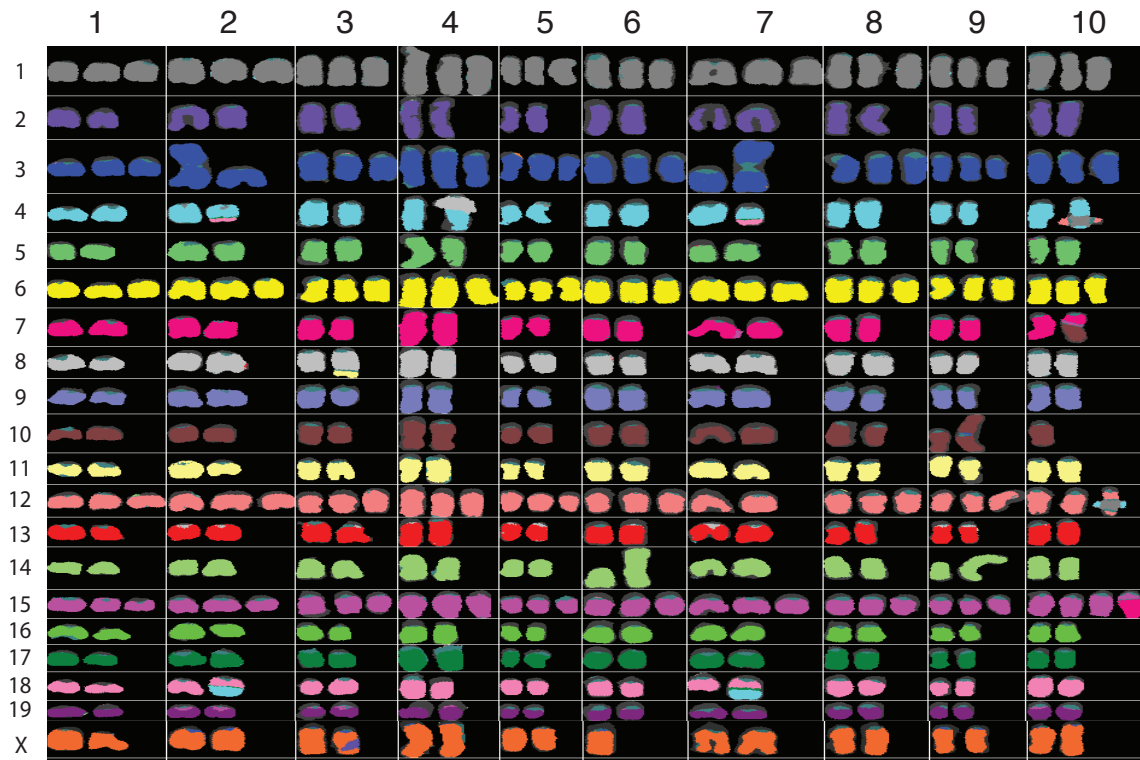

b)

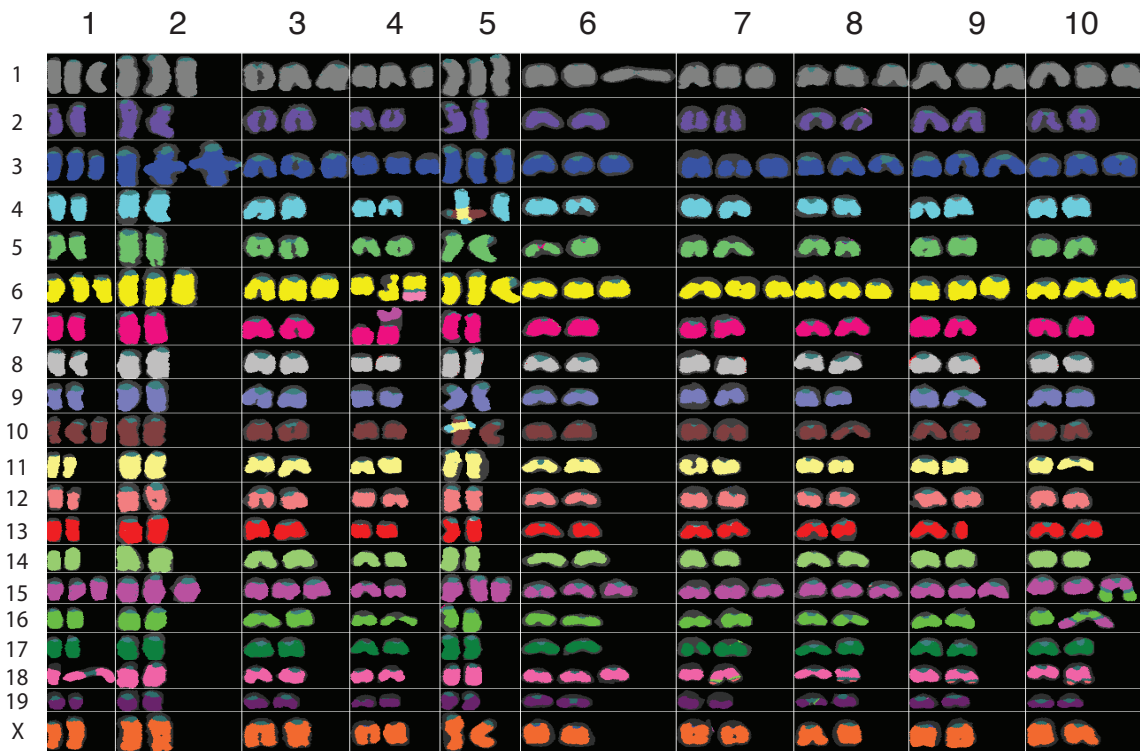

Supplement: MOL2-12-239-s002.pdf [file MOL2-12-239-s002.pdf]
