# Supplementary material for: Comparative genomics reveals that loss of lunatic fringe (LFNG) promotes melanoma metastasis
Source: PubMed Central journal article supplement (PMC5792739; doi:10.1002/1878-0261.12161), 2018-01-07
Supplement: MOL2-12-239-s010.pdf [file MOL2-12-239-s010.pdf]

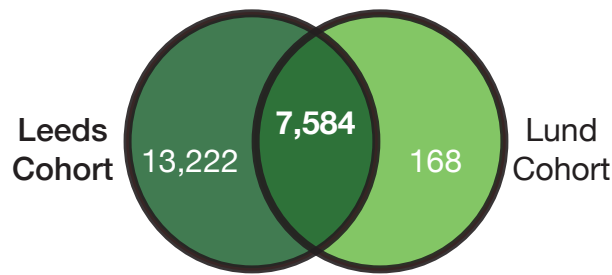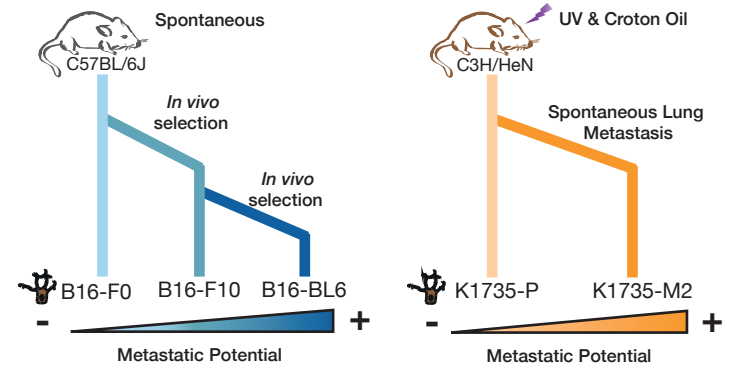

Human cohorts total number of genes assessed in both cohorts **7584**

Number of genes significantly associated with outcome in both cohorts **FDR<0.1**  
**976**

Human cohorts total number of genes assessed in both cohorts **7584**

Total number of differentially expressed genes found in mouse lines comparison **foldChange ≥ 4 and p-adj<0.01**  
**1430**

Number of genes with human orthologue **1290**

Number of genes present in all datasets **388**

Number of genes with a **FDR<0.1** in both human cohorts **61**

Final number of genes with **FDR<0.1** in both human cohorts with the same direction of expression change in metastasis and poor outcome **28**
