# Supplementary material for: Comparative genomics reveals that loss of lunatic fringe (LFNG) promotes melanoma metastasis
Source: PubMed Central journal article supplement (PMC5792739; doi:10.1002/1878-0261.12161), 2018-01-07

**a)**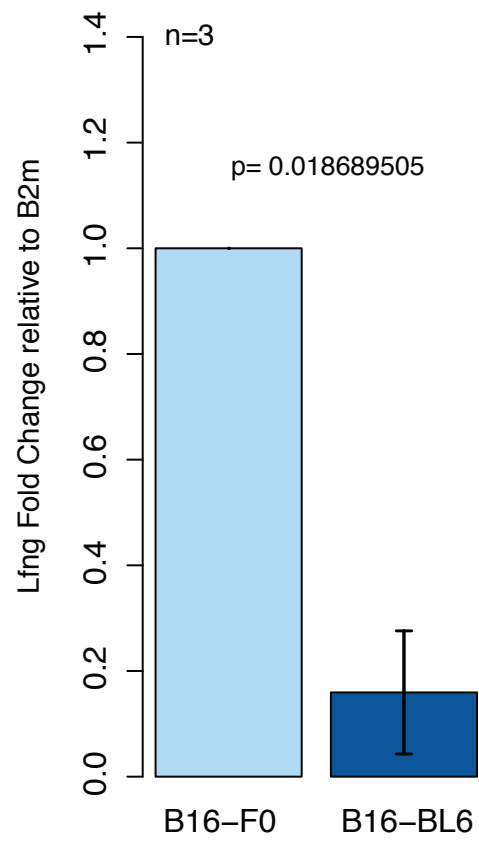**b)** PX459\_Lfng\_g2\_gRNA-PB713B-1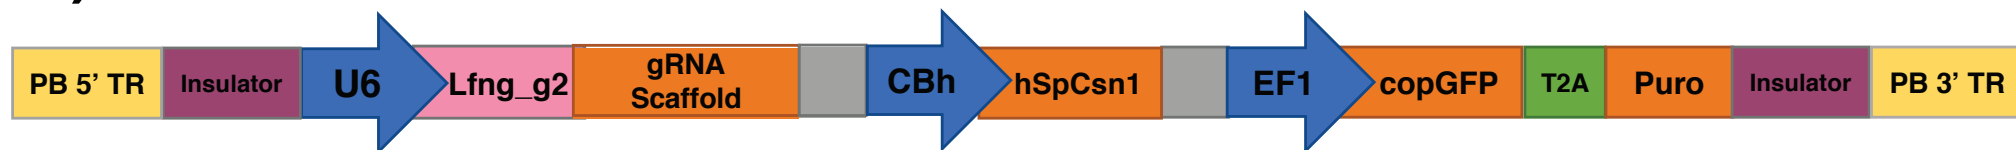

Piggy\_gRNAScaffold-BLASTO

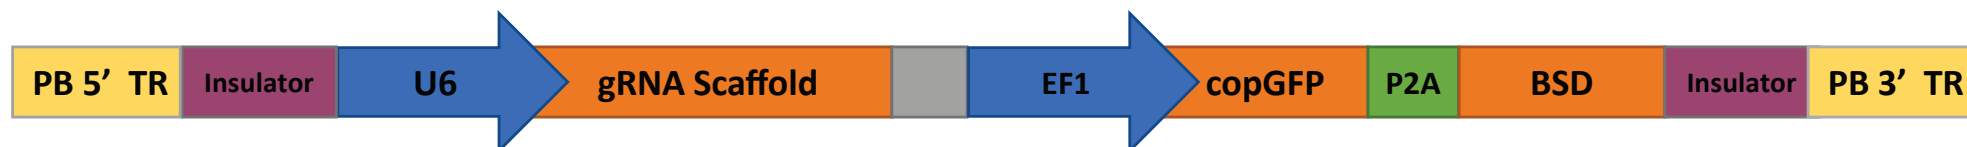

Piggy\_gRNAscaffold-BLASTO-Lfng\_g2\_gRNA

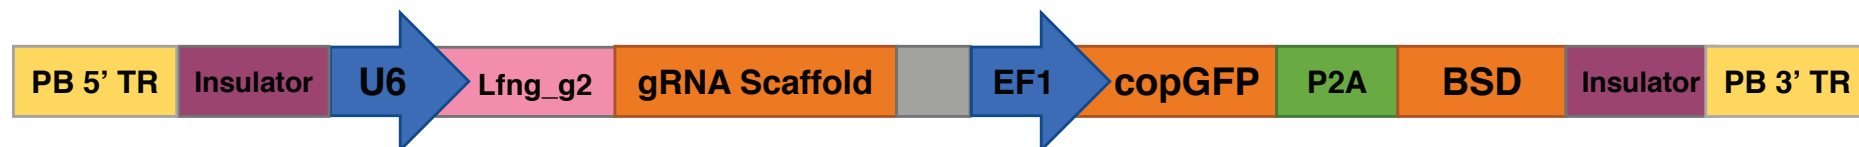

Piggy\_gRNAscaffold-BLASTO-Lfng\_g3\_gRNA

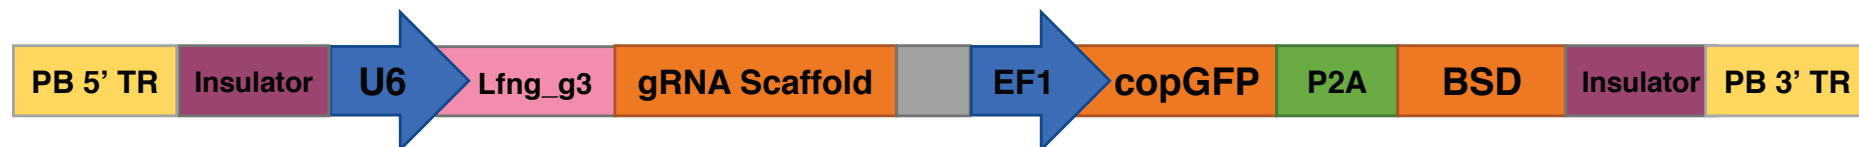

PB533A-2\_Lfng\_cDNA

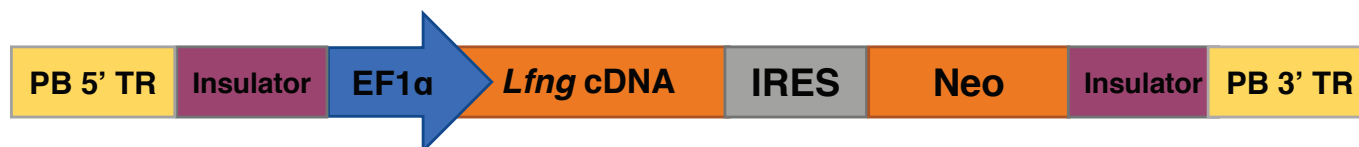

Supplement: MOL2-12-239-s012.pdf [file MOL2-12-239-s012.pdf]
